# Supplementary material for: Prevalence and risk factors for asthma, rhinitis, eczema, and atopy among preschool children in an Andean city
Source: PLoS One. 2020 Jul 10;15(7):e0234633. doi: 10.1371/journal.pone.0234633 (PMC7351199; doi:10.1371/journal.pone.0234633)
Supplement: S1 Data — (XLS) [file pone.0234633.s001.xls]

## Sheet: Sheet1
QCL_1	Yesbling	breastfeed	adaycare	dindoor	mrhinitis	mezcema	frhinitis	fezcema	mpresentsmoke	homesmoke	hservice	electrod	asthma	rhinitis	eczema	sptpoverall	tipe_h
High	1	Yes	Yes	1	No	No	No	No	No	0	Hygienic service	4elec	Yes	Yes	No		public
Medium	1	Yes	No	0	Yes	No	Not Known	Not Known	No	0	Hygienic service	4elec	Yes	Yes	No		public
Medium	1	Yes	No	0	No	No	No	No	No	0	Hygienic service	3elec	No	No	Yes		public
High	1	No	Yes	0	No	No	No	No	No	1	Hygienic service	4elec	No	No	No		public
Low	1	No	No	1	No	No	No	No	No	0	Hygienic service	4elec	Yes	No	No		public
Medium	0	Yes	Yes	0	No	No	Yes	No	No	0	Hygienic service	2 or less	No	Yes	Yes		public
High	0	Yes	No	1	No	Yes	Yes	No	No	0	Hygienic service	3elec	No	No	No		public
Medium	1	Yes	No	1	No	No	No	No	No	0	Hygienic service	4elec	No	Yes	No		public
Low	1	Yes	No	0	No	Yes	Yes	Yes	No	1	Hygienic service	4elec	No	Yes	Yes		public
Medium	1	Yes	No	0	No	No	No	No	No	0	Hygienic service	2 or less	No	Yes	No		public
Low	0	Yes	No	0	Yes	Yes	No	No	No	0	Hygienic service	4elec	Yes	No	No		public
Low	0	Yes	No	1	No	No	No	No	No	1	Hygienic service	4elec	No	No	Yes		public
High	1	Yes	No	0	Yes	Yes	Yes	No	No	0	Hygienic service	4elec	Yes	Yes	No		public
High	1	Yes	No	0	Yes	Yes	No	No	No	0	Hygienic service	4elec	No	Yes	No		public
Medium	1	Yes	No	0	Yes	No	No	No	No	0	Hygienic service	4elec	Yes	Yes	No		private
High	1	Yes	No	1	Yes	No	Yes	No	No	1	Hygienic service	4elec	No	Yes	No		private
Medium	1	No	No	1	No	No	No	No	No	0	Hygienic service	2 or less	No	Yes	Yes		private
Medium	1	Yes	Yes	1	Yes	No	Not Known	Not Known	No	1	Hygienic service	4elec	No	No	No		public
Medium	1	Yes	No	1	No	No	No	No	No	1	Hygienic service	3elec	Yes	No	No		public
Medium	1	Yes	No	0	No	No	No	No	No	0	Hygienic service	4elec	No	Yes	Yes		public
Medium	1	Yes	No	0	Yes	No	No	No	No	0	Hygienic service	3elec	No	No	No		public
Medium	1	Yes	No	1	No	No	No	No	No	0	Hygienic service	3elec	No	No	No		public
High	1	Yes	No	0	No	No	No	No	No	0	Hygienic service	4elec	Yes	Yes	Yes		public
High	1	Yes	Yes	0	No	No	No	No	No	0	Hygienic service	3elec	No	Yes	No		private
Medium	1	Yes	Yes	0	No	No	Yes	No	No	0	Hygienic service	3elec	No	No	No		private
Medium	1	Yes	Yes	0	No	No	No	No	No	0	Hygienic service	3elec	No	Yes	No		private
High	1	Yes	Yes	0	Yes	Yes	Yes	No	No	0	Hygienic service	3elec	No	No	No		private
Medium	1	Yes	Yes	0	No	No	No	No	No	1	Hygienic service	2 or less	No	No	No		private
High	0	Yes	Yes	0	Yes	No	No	No	No	0	Hygienic service	4elec	Yes	Yes	No		private
High	1	Yes	Yes	0	Yes	Yes	No	Yes	No	0	Hygienic service	3elec	No	No	No		private
Medium	1	Yes	Yes	0	No	No	Not Known	Not Known	No	0	Hygienic service	2 or less	Yes	No	No		private
Low	0	Yes	No	0	No	No	No	No	No	0	Hygienic service	4elec	No	Yes	No		public
Low	1	Yes	No	1	No	No	No	Yes	No	1	Hygienic service	4elec	No	No	No		public
Low	0	Yes	Yes	0	No	No	No	No	No	0	Hygienic service	4elec	No	No	No		public
Medium	0	Yes	No	0	Yes	No	No	No	No	0	Hygienic service	2 or less	Yes	No	No		public
Medium	1	Yes	No	1	Yes	Yes	No	No	No	0	Hygienic service	4elec	No	Yes	No		public
Medium	1	Yes	No	0	Yes	No	No	No	No	1	Hygienic service	3elec	No	Yes	No		public
Medium	1	Yes	No	0	No	No	No	No	No	0	Hygienic service	4elec	No	No	No		public
Medium	1	Yes	No	0	No	No	No	No	No	0	Hygienic service	3elec	Yes	No	No		public
Medium	0	Yes	Yes	0	No	No	No	No	No	0	Hygienic service	4elec	No	Yes	No		private
Medium	1	Yes	Yes	0	Yes	No	No	No	No	0	Hygienic service	4elec	Yes	Yes	No		private
Medium	1	Yes	No	0	No	No	Not Known	Not Known	No	0	Hygienic service	2 or less	No	No	No		private
Low	0	Yes	Yes	0	Yes	No	Yes	No	No	0	Hygienic service	3elec	No	No	No		private
Medium	1	Yes	Yes	0	No	No	No	No	No	1	Hygienic service	4elec	No	No	No		private
Medium	1	Yes	Yes	0	Yes	Yes	Not Known	Not Known	No	0	Hygienic service	3elec	Yes	No	Yes		private
High	1	Yes	No	1	No	No	No	No	No	0	Hygienic service	4elec	Yes	Yes	No		private
Medium	1	Yes	No	1	No	No	No	No	No	0	Hygienic service	3elec	No	No	No		public
Medium	1	Yes	No	0	No	No	Yes	No	No	1	Hygienic service	3elec	No	No	No		private
Low	1	Yes	No	0	No	No	No	No	No	0	Hygienic service	3elec	No	No	Yes		private
Medium	1	Yes	No	0	No	No	No	No	No	0	Hygienic service	2 or less	Yes	No	No		private
Medium	0	Yes	No	0	Yes	No	Yes	No	No	0	Hygienic service	4elec	No	Yes	Yes		private
Medium	1	Yes	Yes	1	No	No	Not Known	Not Known	Yes	0	Hygienic service	3elec	No	Yes	Yes		private
Medium	1	Yes	No	1	No	No	No	No	No	0	Hygienic service	3elec	Yes	Yes	Yes		private
Medium	1	Yes	No	0	Yes	No	Yes	Yes	No	0	Hygienic service	3elec	Yes	No	Yes		private
Low	1	Yes	No	0	No	No	No	No	No	0	Hygienic service	4elec	No	Yes	No		private
Medium	1	No	Yes	1	No	No	Not Known	Not Known	No	0	Hygienic service	4elec	No	Yes	No		private
High	1	Yes	Yes	1	No	No	No	No	No	1	Hygienic service	2 or less	No	No	No		private
High	1	Yes	Yes	0	No	No	No	No	No	0	Hygienic service	4elec	Yes	Yes	No		private
High	1	Yes	Yes	1	Yes	No	Yes	No	No	0	Hygienic service	4elec	Yes	Yes	No		private
High	1	Yes	Yes	0	Yes	No	Yes	No	Yes	1	Hygienic service	4elec	No	Yes	Yes		private
High	1	Yes	Yes	0	No	No	No	No	No	1	Hygienic service	4elec	Yes	Yes	No		private
High	1	Yes	Yes	1	No	No	Yes	No	Yes	1	Hygienic service	3elec	No	Yes	No		private
High	1	Yes	No	0	No	No	No	No	No	1	Hygienic service	3elec	Yes	Yes	No		private
High	0	Yes	No	0	No	No	Yes	No	No	1	Hygienic service	4elec	Yes	No	No		private
High	1	Yes	Yes	0	No	No	No	No	No	0	Hygienic service	4elec	No	No	No		private
High	1	Yes	Yes	0	No	No	Yes	No	No	0	Hygienic service	4elec	No	No	No		private
High	1	Yes	Yes	1	No	No	No	No	No	0	Hygienic service	4elec	No	Yes	No		private
High	1	Yes	Yes	1	Yes	No	No	No	No	0	Hygienic service	4elec	No	Yes	No		private
Medium	1	Yes	Yes	0	No	No	No	No	No	0	Hygienic service	3elec	No	No	Yes		private
High	1	Yes	Yes	0	No	No	Yes	No	No	0	Hygienic service	4elec	No	No	No		private
High	1	Yes	No	0	No	Yes	No	No	No	0	Hygienic service	4elec	No	No	Yes		private
High	1	Yes	Yes	0	No	No	No	No	Yes	1	Hygienic service	3elec	No	No	No		private
High	1	Yes	No	0	No	Yes	No	No	No	0	Hygienic service	4elec	No	No	No		private
High	1	Yes	No	0	No	No	No	No	No	0	Hygienic service	4elec	No	No	No		private
High	0	Yes	Yes	1	No	No	No	No	No	0	Hygienic service	3elec	No	No	Yes		private
Medium	1	Yes	Yes	1	Yes	Yes	No	No	No	0	Hygienic service	4elec	No	No	Yes		private
High	1	Yes	Yes	0	No	No	No	No	No	0	Hygienic service	4elec	No	No	No		private
High	1	Yes	No	0	No	No	No	No	No	0	Hygienic service	4elec	No	No	No		private
High	1	Yes	Yes	1	Yes	No	Yes	No	No	0	Hygienic service	4elec	No	Yes	No		private
High	1	Yes	Yes	0	No	No	Yes	Yes	No	0	Hygienic service	4elec	No	Yes	No		private
High	1	Yes	No	0	Yes	No	No	No	No	0	Hygienic service	4elec	No	No	No		private
Medium	0	Yes	No	0	No	No	No	No	No	0	Hygienic service	4elec	No	Yes	Yes		private
High	1	Yes	Yes	1	No	No	Yes	No	No	0	Hygienic service	4elec	No	Yes	No		private
High	1	Yes	Yes	0	Yes	Yes	No	No	No	0	Hygienic service	4elec	No	Yes	No		private
High	1	Yes	Yes	0	No	No	Yes	Not Known	No	1	Hygienic service	4elec	No	Yes	Yes		private
High	1	Yes	Yes	0	No	Yes	No	Yes	No	0	Hygienic service	4elec	No	Yes	Yes		private
Medium	1	Yes	No	1	No	No	Yes	No	No	0	Hygienic service	4elec	No	No	No		private
High	1	Yes	No	1	No	No	No	No	No	1	Hygienic service	4elec	No	No	No		private
High	1	Yes	No	0	No	No	No	No	No	0	Hygienic service	4elec	No	No	No		private
High	1	Yes	No	0	No	No	No	No	No	0	Hygienic service	4elec	No	No	Yes		private
High	1	Yes	No	0	No	No	Yes	No	No	0	Hygienic service	4elec	No	No	Yes		private
Low	0	Yes	No	1	No	No	No	No	No	1	Hygienic service	3elec	No	No	Yes		public
Medium	1	Yes	No	1	No	No	Not Known	Not Known	No	0	Hygienic service	4elec	No	No	No		public
Medium	1	Yes	No	0	No	No	No	No	No	0	Hygienic service	3elec	No	No	Yes		public
Low	1	Yes	No	0	No	No	No	Yes	No	0	Hygienic service	2 or less	No	No	Yes		public
Low	1	Yes	No	0	No	No	No	No	No	0	Hygienic service	3elec	No	No	No		public
Medium	1	Yes	No	0	No	No	No	No	No	1	Hygienic service	4elec	No	Yes	No		public
Low	1	No	No	0	No	No	Not Known	Not Known	No	0	Hygienic service	4elec	No	Yes	Yes		public
Low	1	No	No	0	No	No	No	No	No	0	Hygienic service	3elec	No	No	No		public
Low	0	Yes	No	0	No	No	No	No	No	0	Hygienic service	2 or less	No	No	Yes		public
Medium	1	Yes	Yes	0	No	No	No	No	No	1	Hygienic service	2 or less	No	Yes	No		public
Medium	1	Yes	Yes	0	Yes	No	No	No	No	0	Hygienic service	3elec	No	No	No		public
Low	1	Yes	No	0	No	No	No	No	No	0	Hygienic service	3elec	No	No	No		public
Low	0	No	No	1	No	No	No	Yes	No	0	Hygienic service	4elec	No	No	Yes		public
Medium	1	Yes	No	0	No	No	No	No	No	0	Hygienic service	2 or less	Yes	Yes	Yes		public
Medium	0	Yes	No	0	No	No	No	No	No	0	Hygienic service	3elec	No	No	No		public
Low	1	Yes	Yes	0	No	No	Not Known	Not Known	No	0	Hygienic service	4elec	No	No	No		public
High	1	Yes	Yes	0	Yes	Yes	Yes	No	No	0	Hygienic service	2 or less	No	Yes	No		public
Medium	1	Yes	Yes	0	No	No	No	No	No	0	Hygienic service	4elec	No	No	No		public
Low	1	Yes	No	0	No	No	No	No	No	0	Hygienic service	3elec	No	No	Yes		public
Medium	0	Yes	Yes	0	No	Yes	Not Known	Not Known	No	0	Hygienic service	4elec	No	Yes	Yes		public
Low	0	Yes	No	0	No	No	Not Known	Not Known	No	0	Hygienic service	2 or less	No	Yes	Yes		public
Medium	1	Yes	Yes	1	Yes	No	Yes	No	No	0	Hygienic service	3elec	No	Yes	Yes		public
Medium	1	Yes	No	1	No	No	No	No	No	0	Hygienic service	3elec	No	No	No		public
Low	1	Yes	No	1	Yes	Yes	Yes	No	No	0	Hygienic service	4elec	No	Yes	Yes		public
Medium	1	Yes	No	0	No	No	No	No	No	0	Hygienic service	3elec	No	No	Yes		public
Medium	1	Yes	No	0	No	No	Yes	No	No	1	Hygienic service	3elec	No	Yes	Yes		public
Low	1	Yes	No	0	No	No	No	No	No	0	Hygienic service	3elec	No	No	No		public
Medium	1	Yes	Yes	0	No	No	No	No	No	0	Hygienic service	3elec	No	Yes	No		public
Medium	1	Yes	No	1	No	No	No	No	No	0	Hygienic service	4elec	No	Yes	Yes		public
High	1	Yes	No	0	No	No	Yes	No	No	0	Hygienic service	4elec	No	No	No		public
Low	1	Yes	Yes	1	Yes	Yes	Not Known	Not Known	No	1	Hygienic service	4elec	Yes	Yes	Yes		private
Medium	1	Yes	Yes	0	Yes	No	Not Known	Yes	No	1	Hygienic service	2 or less	No	Yes	Yes		private
Low	1	Yes	Yes	0	No	No	No	No	No	0	Hygienic service	3elec	No	No	No		private
Low	1	Yes	Yes	0	No	No	No	No	No	0	Hygienic service	4elec	No	Yes	No		private
High	1	Yes	Yes	0	No	No	No	No	No	0	Hygienic service	4elec	No	Yes	Yes		private
Low	1	Yes	No	0	No	No	No	No	No	0	Hygienic service	4elec	No	No	No		private
Low	1	Yes	No	0	No	No	No	No	No	0	Hygienic service	2 or less	No	Yes	No		private
Medium	1	Yes	No	0	No	No	No	No	No	1	Hygienic service	4elec	No	Yes	Yes		private
Low	1	Yes	Yes	1	No	No	No	No	No	0	Hygienic service	4elec	No	Yes	No		private
Medium	1	Yes	No	1	No	No	No	No	No	0	Hygienic service	4elec	No	No	No		private
Medium	1	Yes	No	1	No	No	No	No	No	0	Hygienic service	4elec	Yes	No	No		private
Medium	1	Yes	No	0	No	No	No	No	No	1	Hygienic service	3elec	No	No	No		private
Low	0	No	No	0	No	No	No	No	No	0	Hygienic service	3elec	No	No	No		public
Medium	1	Yes	Yes	1	No	No	Yes	No	No	0	Hygienic service	4elec	No	Yes	Yes		public
Low	1	Yes	Yes	0	Yes	No	No	No	No	0	Hygienic service	4elec	No	No	No		public
Low	1	Yes	No	1	No	Yes	No	Yes	No	0	Hygienic service	2 or less	No	Yes	Yes		public
Medium	1	Yes	No	0	Yes	No	No	No	Yes	0	Hygienic service	4elec	No	No	No		public
Low	1	Yes	No	0	No	No	Yes	No	No	0	Hygienic service	3elec	No	Yes	No		public
Medium	1	Yes	Yes	0	Yes	No	Yes	Yes	No	1	Hygienic service	2 or less	Yes	Yes	Yes		public
Medium	1	Yes	Yes	0	Yes	Yes	No	No	No	1	Hygienic service	4elec	No	Yes	Yes		public
Medium	1	Yes	No	1	No	No	Not Known	Not Known	No	0	Hygienic service	4elec	No	Yes	Yes		public
Medium	1	Yes	No	0	No	No	Not Known	No	No	0	Hygienic service	4elec	No	Yes	No		public
High	1	No	Yes	1	No	No	Yes	No	No	0	Hygienic service	4elec	No	Yes	No		public
Medium	1	Yes	No	0	No	No	Yes	No	No	0	Hygienic service	3elec	Yes	No	Yes		public
Medium	1	Yes	No	0	No	No	No	No	No	0	Hygienic service	4elec	No	No	No		public
Medium	0	No	No	0	No	No	No	No	No	0	Hygienic service	3elec	No	Yes	Yes		public
Low	1	Yes	Yes	0	Yes	No	No	No	No	0	Hygienic service	2 or less	No	No	No		public
Medium	1	Yes	No	1	No	No	No	No	No	0	Hygienic service	2 or less	No	No	Yes		public
Medium	1	Yes	Yes	0	No	No	Not Known	Not Known	No	0	Hygienic service	4elec	Yes	Yes	No		public
Low	1	Yes	No	0	No	No	No	No	No	0	Hygienic service	3elec	No	No	No		public
Medium	1	Yes	No	0	Yes	No	No	No	No	0	Hygienic service	2 or less	Yes	Yes	No		public
Medium	1	Yes	No	0	No	Yes	No	No	No	0	Hygienic service	2 or less	No	Yes	No		public
Medium	1	Yes	No	0	No	No	No	No	No	0	Hygienic service	4elec	No	No	No		public
Medium	1	Yes	Yes	0	No	No	Not Known	Not Known	No	0	Hygienic service	2 or less	No	No	No		public
Medium	1	Yes	No	0	No	No	No	No	No	0	Hygienic service	4elec	No	No	Yes		public
Medium	1	Yes	No	0	No	No	No	No	No	0	Hygienic service	3elec	No	Yes	No		public
Medium	1	Yes	No	0	Yes	No	No	No	No	0	Hygienic service	3elec	No	Yes	No		public
Medium	1	Yes	No	0	No	No	No	No	No	0	Hygienic service	2 or less	No	No	No		public
Medium	0	Yes	No	0	No	No	No	No	No	0	Hygienic service	4elec	Yes	Yes	No		private
Medium	1	Yes	Yes	1	No	No	Not Known	Not Known	No	1	Hygienic service	4elec	No	Yes	No		private
High	1	Yes	Yes	0	No	No	No	No	No	0	Hygienic service	3elec	No	Yes	Yes		private
High	1	Yes	No	0	Yes	No	Yes	No	No	1	Hygienic service	2 or less	No	Yes	No		private
Medium	1	Yes	Yes	0	No	No	No	No	No	0	Hygienic service	3elec	No	Yes	No		private
Medium	1	Yes	Yes	0	No	Yes	No	No	No	0	Hygienic service	3elec	Yes	Yes	No		private
Medium	1	Yes	No	1	No	No	No	No	No	1	Hygienic service	4elec	No	No	No		private
High	1	Yes	No	0	No	No	No	No	No	0	Hygienic service	4elec	No	No	No		private
Medium	1	No	Yes	1	No	No	Not Known	Not Known	No	0	Hygienic service	4elec	Yes	No	No		private
High	0	Yes	No	0	No	No	No	No	No	1	Hygienic service	4elec	Yes	Yes	Yes		public
Medium	0	Yes	No	0	No	No	No	No	No	0	Hygienic service	3elec	No	No	No		public
Medium	1	Yes	Yes	1	No	No	Not Known	Not Known	No	1	Hygienic service	4elec	No	No	Yes		public
Medium	1	Yes	No	0	No	No	No	No	No	1	Hygienic service	3elec	No	No	No		public
Low	0	Yes	No	1	No	No	No	No	No	0	Hygienic service	3elec	No	No	No		public
Low	0	Yes	No	0	No	No	No	No	No	0	Hygienic service	4elec	No	No	No		public
Medium	1	Yes	Yes	0	No	No	No	No	No	0	Hygienic service	4elec	No	No	No		public
High	1	Yes	No	1	Yes	No	No	No	No	1	Hygienic service	4elec	No	No	No		public
Medium	1	Yes	No	0	No	No	No	No	No	0	Hygienic service	4elec	No	Yes	Yes		public
Medium	1	Yes	No	0	No	No	No	No	No	1	Hygienic service	3elec	No	No	No		public
Low	1	Yes	No	0	No	No	No	No	No	1	Hygienic service	4elec	No	No	No		public
Low	1	Yes	Yes	1	No	Yes	Not Known	Not Known	No	0	latine or field	2 or less	No	Yes	No		public
Low	0	Yes	Yes	0	Yes	No	No	No	No	0	Hygienic service	3elec	No	Yes	Yes		public
Medium	0	Yes	No	0	No	No	No	No	No	0	Hygienic service	4elec	No	No	Yes		public
Low	1	Yes	No	1	No	No	No	No	No	0	Hygienic service	3elec	No	No	No		public
Medium	1	Yes	No	0	No	No	No	No	No	1	Hygienic service	3elec	No	Yes	Yes		public
Medium	1	Yes	No	0	No	No	No	No	No	0	Hygienic service	3elec	No	No	No		public
Medium	1	Yes	No	1	Yes	No	No	No	No	0	Hygienic service	3elec	No	No	No		public
Low	1	Yes	No	0	No	No	Yes	No	No	0	Hygienic service	3elec	No	No	No		public
Medium	1	Yes	No	0	Yes	No	Not Known	Not Known	No	0	Hygienic service	3elec	Yes	No	No		public
Low	0	Yes	No	1	No	No	Not Known	Not Known	No	0	latine or field	3elec	No	No	No		public
Medium	1	Yes	Yes	1	No	No	Yes	Yes	No	1	latine or field	3elec	Yes	Yes	Yes		public
Low	0	Yes	Yes	1	No	Yes	Not Known	Not Known	No	0	Hygienic service	2 or less	No	No	Yes		public
Medium	0	Yes	No	0	No	No	No	No	No	1	Hygienic service	4elec	No	No	No		public
Medium	1	Yes	Yes	0	No	No	No	Not Known	No	0	Hygienic service	2 or less	No	No	Yes		public
Medium	1	Yes	No	1	No	No	Not Known	Not Known	No	1	Hygienic service	2 or less	Yes	No	Yes		public
Medium	1	Yes	No	1	No	No	No	No	No	0	Hygienic service	2 or less	No	No	No		public
Medium	1	Yes	No	0	No	No	No	No	No	0	Hygienic service	4elec	No	No	No		public
Low	0	Yes	No	0	No	No	No	No	No	0	Hygienic service	4elec	No	No	No		public
Medium	1	Yes	No	0	No	No	No	No	No	0	Hygienic service	2 or less	No	No	No		public
Medium	1	Yes	No	0	No	No	No	No	Yes	1	Hygienic service	4elec	No	No	No		public
Medium	1	Yes	No	0	No	No	No	No	No	0	Hygienic service	4elec	No	Yes	Yes		public
Medium	1	Yes	No	0	Yes	Yes	Not Known	Not Known	No	0	Hygienic service	2 or less	No	No	No		public
Medium	1	Yes	No	0	No	No	No	No	No	0	Hygienic service	4elec	No	Yes	No		public
Medium	1	Yes	No	0	Yes	No	No	No	No	0	Hygienic service	4elec	No	Yes	No		public
Medium	1	No	No	0	No	No	Not Known	Not Known	No	0	Hygienic service	2 or less	No	Yes	Yes		public
Medium	0	Yes	No	1	No	Yes	No	No	No	0	Hygienic service	4elec	No	No	No		public
Medium	0	Yes	No	1	Yes	Yes	Yes	No	No	0	Hygienic service	3elec	No	Yes	Yes		public
Medium	1	Yes	Yes	0	No	No	No	No	No	0	Hygienic service	2 or less	No	No	No		public
Medium	1	Yes	No	1	Yes	No	No	No	No	0	Hygienic service	4elec	No	Yes	No		public
	1	Yes	No	0	No	No	No	No	No	1	Hygienic service	2 or less	Yes	Yes	Yes		public
Medium	1	Yes	No	0	Yes	Yes	Yes	Yes	Yes	1	Hygienic service	4elec	No	Yes	Yes		public
Low	0	Yes	No	0	No	No	No	No	No	0	Hygienic service	3elec	No	No	No		private
Medium	1	Yes	No	1	No	No	No	No	No	0	Hygienic service	3elec	No	Yes	Yes		private
High	1	Yes	No	0	No	No	No	No	No	0	Hygienic service	4elec	No	Yes	No		private
High	1	Yes	No	0	Yes	No	No	No	Yes	1	Hygienic service	4elec	No	Yes	No		private
Low	1	Yes	No	0	No	No	No	No	No	0	Hygienic service	4elec	No	No	No		private
Low	0	Yes	No	0	No	No	Not Known	Not Known	No	0	Hygienic service	3elec	No	No	No		public
Medium	1	Yes	No	1	No	No	No	No	No	1	Hygienic service	2 or less	No	No	No		public
Low	1	Yes	No	1	No	No	No	No	No	1	Hygienic service	4elec	Yes	No	Yes		public
Low	1	Yes	No	0	No	No	No	No	No	0	Hygienic service	4elec	No	No	No		public
Medium	1	No	Yes	0	No	No	No	No	No	0	Hygienic service	3elec	Yes	Yes	No		public
Low	1	No	No	1	No	No	Not Known	Not Known	No	0	Hygienic service	3elec	No	No	No		public
Low	0	Yes	No	0	No	No	Not Known	Not Known	No	0	latine or field	2 or less	No	Yes	No		public
Medium	1	Yes	Yes	1	No	No	No	No	No	1	Hygienic service	3elec	Yes	No	No		public
Medium	1	Yes	No	0	No	No	Yes	Yes	No	0	Hygienic service	4elec	No	No	Yes		public
Low	0	Yes	No	1	No	No	No	Yes	Yes	1	Hygienic service	2 or less	No	No	No		public
Low	1	Yes	Yes	1	Yes	Yes	No	Yes	No	1	Hygienic service	4elec	No	Yes	No		public
Medium	1	Yes	No	1	No	No	No	No	No	0	Hygienic service	4elec	No	No	No		public
Medium	1	Yes	No	0	No	No	No	No	No	0	Hygienic service	4elec	No	No	No		public
Medium	1	No	No	1	No	No	No	No	No	0	Hygienic service	4elec	No	No	No		public
Medium	0	Yes	No	1	Yes	No	No	No	No	0	Hygienic service	3elec	No	Yes	Yes		public
Low	0	Yes	No	0	No	Yes	No	Yes	No	0	Hygienic service	4elec	Yes	Yes	Yes		public
Low	1	Yes	Yes	0	No	No	No	No	No	1	Hygienic service	3elec	No	No	No		public
Low	1	Yes	No	1	No	No	Not Known	Not Known	No	0	Hygienic service	2 or less	No	No	No		public
Medium	0	Yes	No	0	No	No	No	No	No	0	Hygienic service	2 or less	No	No	No		public
Medium	0	Yes	No	0	No	No	No	No	No	0	Hygienic service	2 or less	No	No	No		public
Medium	1	Yes	Yes	1	No	No	No	No	No	0	Hygienic service	3elec	No	Yes	No		public
Low	1	Yes	No	1	No	No	No	Not Known	No	0	Hygienic service	4elec	No	Yes	No		public
Medium	1	Yes	No	1	No	No	No	No	No	0	Hygienic service	3elec	No	No	No		public
Low	1	Yes	No	1	No	No	No	No	No	0	Hygienic service	4elec	No	No	Yes		public
High	1	Yes	No	0	No	No	No	No	No	0	Hygienic service	4elec	No	No	No		public
Medium	1	Yes	No	0	No	No	No	No	No	0	Hygienic service	3elec	No	No	No		public
High	1	Yes	No	0	No	No	No	No	No	0	Hygienic service	3elec	No	No	No		public
Low	1	Yes	No	0	No	No	No	No	No	1	Hygienic service	3elec	No	Yes	No		public
Medium	1	Yes	No	0	No	No	No	No	No	0	Hygienic service	3elec	No	Yes	No		public
Medium	1	Yes	No	0	No	No	No	No	No	0	latine or field	3elec	No	No	No		public
High	1	Yes	Yes	0	No	Yes	No	No	No	0	Hygienic service	3elec	No	No	No		private
Medium	1	Yes	No	1	Yes	No	Yes	No	No	1	Hygienic service	3elec	No	Yes	No		private
Medium	1	Yes	No	0	No	No	No	No	No	0	Hygienic service	2 or less	No	No	Yes		private
Low	1	Yes	No	0	Yes	Yes	Not Known	Not Known	No	0	Hygienic service	3elec	Yes	No	Yes		private
Medium	0	Yes	Yes	0	Yes	Yes	Not Known	No	No	0	Hygienic service	3elec	Yes	Yes	No		private
Medium	1	Yes	No	1	No	No	Not Known	Not Known	No	0	Hygienic service	3elec	No	No	Yes		private
Medium	1	Yes	No	1	No	No	No	No	No	0	Hygienic service	4elec	No	No	No		private
Medium	1	Yes	No	0	No	No	No	Yes	No	0	Hygienic service	2 or less	No	No	No		private
Medium	1	Yes	No	0	No	No	Yes	No	No	0	Hygienic service	4elec	No	No	No		private
	1	Yes	No	0	No	No	No	No	No	1	Hygienic service	2 or less	No	No	No		private
	1	Yes	No	0	No	Yes	Yes	Yes	No	0	Hygienic service	3elec	Yes	Yes	No		private
Medium	1	Yes	No	0	No	No	No	No	No	0	Hygienic service	3elec	Yes	No	Yes		private
High	1	Yes	No	0	No	No	No	No	No	0	Hygienic service	3elec	No	No	No		private
	1	No	No	0	Yes	No	Yes	No	No	0	Hygienic service	4elec	No	Yes	Yes		private
Medium	1	Yes	Yes	0	No	No	Yes	No	No	0	Hygienic service	3elec	No	Yes	No		public
Medium	1	Yes	No	1	No	No	Not Known	Not Known	No	0	Hygienic service	3elec	No	No	No		public
Low	1	Yes	No	1	No	No	No	No	No	0	Hygienic service	4elec	No	No	Yes		public
Low	1	Yes	No	1	No	No	Not Known	Not Known	No	0	Hygienic service	4elec	No	No	No		public
Medium	1	Yes	No	0	No	No	No	No	No	0	Hygienic service	3elec	No	Yes	Yes		public
High	1	Yes	No	0	No	No	No	No	No	1	Hygienic service	4elec	No	No	No		public
Low	1	Yes	No	0	No	No	No	No	No	0	Hygienic service	3elec	No	No	No		public
Medium	1	Yes	No	0	Yes	Yes	No	No	No	0	Hygienic service	2 or less	No	Yes	Yes		public
Medium	1	Yes	No	0	Yes	Yes	No	No	No	0	Hygienic service	3elec	No	Yes	Yes		public
Low	1	Yes	No	1	No	No	No	No	No	0	Hygienic service	3elec	No	No	No		public
Low	0	Yes	Yes	1	No	No	No	No	No	0	Hygienic service	4elec	No	No	No		private
Low	1	Yes	No	1	Yes	No	Not Known	Not Known	Yes	0	Hygienic service	2 or less	Yes	No	Yes		private
Low	1	Yes	No	0	No	No	No	No	No	0	Hygienic service	3elec	No	No	No		private
Low	1	Yes	No	0	No	No	No	No	No	0	Hygienic service	4elec	Yes	Yes	Yes		private
Medium	1	Yes	No	0	No	No	No	No	No	0	Hygienic service	3elec	No	No	Yes		private
High	0	Yes	Yes	0	No	No	No	No	No	0	Hygienic service	4elec	No	Yes	No		private
High	1	Yes	No	0	Yes	Yes	Yes	No	No	0	Hygienic service	4elec	Yes	Yes	No		private
High	1	Yes	Yes	1	No	No	Yes	No	No	0	Hygienic service	4elec	No	No	No		private
High	1	Yes	Yes	0	No	No	Yes	No	Yes	0	Hygienic service	4elec	No	Yes	No		private
High	1	Yes	Yes	0	Yes	No	No	No	No	0	Hygienic service	4elec	No	Yes	No		private
High	1	Yes	No	0	No	No	Yes	No	No	0	Hygienic service	4elec	No	Yes	No		private
Medium	1	Yes	No	0	No	No	No	No	No	1	Hygienic service	2 or less	No	No	No		private
Medium	1	Yes	No	0	Yes	No	Yes	No	No	0	Hygienic service	4elec	Yes	No	No		private
High	1	No	Yes	0	Yes	No	Yes	No	No	0	Hygienic service	4elec	No	No	No		private
High	1	Yes	Yes	1	Yes	Yes	Yes	No	No	0	Hygienic service	3elec	No	No	No		private
High	1	Yes	Yes	0	No	No	No	No	No	0	Hygienic service	2 or less	No	No	No		private
High	1	Yes	Yes	0	Yes	Yes	Yes	No	No	0	Hygienic service	3elec	No	No	No		private
High	1	No	Yes	0	Yes	No	No	No	No	0	Hygienic service	4elec	Yes	Yes	No		private
High	1	Yes	Yes	1	Yes	No	No	No	No	0	Hygienic service	4elec	No	Yes	No		private
High	1	Yes	Yes	0	Yes	No	Yes	No	No	1	Hygienic service	4elec	No	Yes	Yes		private
High	1	Yes	Yes	0	Yes	No	No	No	No	0	Hygienic service	4elec	No	No	No		private
High	1	Yes	No	0	No	No	No	No	No	0	Hygienic service	4elec	Yes	No	No		private
High	1	Yes	Yes	0	Yes	No	Yes	No	No	0	Hygienic service	4elec	No	Yes	Yes		private
High	1	Yes	Yes	0	No	No	No	No	No	0	Hygienic service	4elec	No	Yes	No		private
Medium	1	Yes	No	0	No	No	No	No	No	0	Hygienic service	4elec	Yes	No	No		private
Medium	1	Yes	Yes	1	No	No	Yes	No	No	0	Hygienic service	2 or less	Yes	Yes	Yes		public
Medium	1	Yes	Yes	0	Yes	No	Not Known	No	No	0	Hygienic service	3elec	No	No	No		public
	0	Yes	No	1	No	No	No	No	No	0	Hygienic service	4elec	No	Yes	No		public
	1	Yes	No	1	No	No	No	No	No	0	Hygienic service	2 or less	No	No	No		public
	1	Yes	No	0	No	No	Yes	No	No	0	Hygienic service	3elec	No	No	No		public
High	0	Yes	Yes	0	No	No	No	No	No	0	Hygienic service	4elec	No	Yes	No		private
High	1	Yes	Yes	0	No	No	No	No	No	0	Hygienic service	4elec	No	Yes	No		private
High	1	Yes	No	0	No	No	No	No	No	1	Hygienic service	2 or less	No	Yes	No		private
High	1	Yes	No	0	Yes	No	No		No	0	Hygienic service	4elec	No	No	No		private
High	1	Yes	Yes	0	No	No	No	No	No	0	Hygienic service	4elec	No	No	Yes		private
High	1	Yes	No	0	No	No	No	No	No	1	Hygienic service	4elec	No	No	No		private
High	0	Yes	Yes	0	No	No	Yes	No	No	0	Hygienic service	4elec	No	No	No		private
High	1	Yes	Yes	0	Yes	No	No	No	No	0	Hygienic service	4elec	No	No	No		private
High	1	Yes	Yes	0	No	No	No	No	No	0	Hygienic service	4elec	No	Yes	No		private
High	1	Yes	Yes	0	No	Yes	Yes	No	No	0	Hygienic service	4elec	No	No	No		private
High	1	Yes	No	0	No	No	No	No	No	0	Hygienic service	4elec	No	No	No		private
Medium	1	Yes	No	0	No	No	No	No	No	0	Hygienic service	4elec	No	No	No		private
High	1	Yes	Yes	1	No	No	Yes	No	No	0	Hygienic service	4elec	No	Yes	No		private
High	1	Yes	Yes	0	No	No	No	No	No	0	Hygienic service	4elec	Yes	Yes	No		private
High	1	Yes	Yes	0	Yes	Yes	Yes	No	No	0	Hygienic service	4elec	No	No	No		private
High	1	Yes	Yes	0	Yes	No	No	No	No	0	Hygienic service	4elec	No	No	No		private
High	0	Yes	Yes	0	No	No	Yes	Yes	No	0	Hygienic service	4elec	No	Yes	No		private
High	1	Yes	Yes	0	No	No	No	No	No	0	Hygienic service	4elec	Yes	Yes	No		private
High	1	Yes	Yes	0	Yes	No	No	No	No	0	Hygienic service	4elec	No	Yes	No		private
High	1	No	No	0	No	No	No	No	No	0	Hygienic service	4elec	No	Yes	No		private
High	1	Yes	Yes	1	No	Yes	Yes	No	Yes	1	Hygienic service	2 or less	No	No	No		private
High	1	Yes	Yes	0	No	No	No	No	No	0	Hygienic service	4elec	No	Yes	No		private
Medium	1	Yes	No	0	No	No	Yes	No	No	0	Hygienic service	4elec	No	Yes	No		private
High	1	No	Yes	1	No	No	Yes	No	No	0	Hygienic service	4elec	No	Yes	No		private
Medium	1	Yes	Yes	0	No	No	No	No	No	0	Hygienic service	4elec	No	Yes	No		private
Medium	1	Yes	Yes	0	Yes	No	Yes	No	Yes	1	Hygienic service	4elec	No	Yes	No		private
High	1	Yes	Yes	0	No	No	No	No	No	0	Hygienic service	4elec	No	No	No		private
High	1	Yes	No	1	Yes	No	Yes	No	Yes	1	Hygienic service	2 or less	Yes	Yes	No		private
High	1	Yes	Yes	0	No	No	No	No	No	0	Hygienic service	4elec	No	Yes	No		private
Low	1	Yes	Yes	0	No	No	Yes	No	No	0	Hygienic service	3elec	No	No	Yes		private
High	1	Yes	Yes	0	Yes	No	No	No	No	0	Hygienic service	4elec	No	Yes	No		private
Medium	1	Yes	Yes	1	No	No	Yes	No	No	0	Hygienic service	4elec	No	No	Yes		private
High	1	Yes	Yes	0	Yes	No	Yes	No	No	0	Hygienic service	4elec	No	Yes	No		private
Medium	0	Yes	No	1	No	No	No	No	No	0	Hygienic service	4elec	No	No	No		private
High	1	Yes	Yes	0	No	No	No	No	No	0	Hygienic service	4elec	No	No	No		private
Medium	1	Yes	No	0	No	No	No	No	No	0	Hygienic service	4elec	No	No	No		private
Medium	1	Yes	No	0	No	No	No	No	No	0	latine or field	4elec	No	No	No		private
High	1	Yes	Yes	1	Yes	No	Yes	No	No	0	Hygienic service	4elec	Yes	Yes	No		private
Medium	1	Yes	No	0	No	No	No	No	No	0	Hygienic service	4elec	No	No	No		private
High	1	No	No	0	No	Yes	No	No	No	0	Hygienic service	2 or less	No	Yes	No		private
High	1	Yes	Yes	0	No	No	No	Yes	No	0	Hygienic service	3elec	No	Yes	Yes		private
Medium	1	Yes	No	1	No	No	No	No	No	0	Hygienic service	2 or less	Yes	Yes	No		private
Medium	1	Yes	No	1	No	No	Yes	No	No	0	Hygienic service	3elec	Yes	Yes	No		private
High	0	Yes	Yes	1	No	No	Yes	No	No	0	Hygienic service	4elec	Yes	Yes	No		private
Medium	1	Yes	Yes	1	No	No	No	No	No	0	Hygienic service	4elec	No	Yes	No		private
Medium	1	Yes	No	1	No	No	No	No	No	0	Hygienic service	4elec	No	No	No		private
Medium	1	No	No	0	No	No	No	No	No	0	Hygienic service	4elec	No	No	No		private
Low	0	Yes	No	0	No	No	No	No	No	0	Hygienic service	4elec	No	Yes	Yes		public
High	1	Yes	Yes	1	No	No	Yes	Yes	No	0	Hygienic service	4elec	No	No	Yes		public
Medium	1	Yes	Yes	0	No	No	No	Yes	No	1	Hygienic service	2 or less	No	Yes	Yes		public
Medium	1	No	No	0	Yes	No	No	No	No	0	Hygienic service	4elec	No	No	No		public
Medium	0	Yes	No	1	Yes	No	No	No	No	0	Hygienic service	3elec	No	No	No		public
Low	1	Yes	Yes	0	No	No	No	No	No	0	Hygienic service	4elec	No	Yes	No		public
High	1	Yes	No	1	No	Yes	Yes	No	No	0	Hygienic service	3elec	No	No	Yes		public
Medium	1	Yes	No	0	Yes	No	No	No	No	1	Hygienic service	2 or less	Yes	Yes	No		public
Medium	1	Yes	No	0	Yes	No	No	Yes	No	0	Hygienic service	3elec	No	Yes	No		public
Medium	0	Yes	Yes	1	No	No	Not Known	Not Known	No	0	Hygienic service	3elec	No	No	No		public
Medium	0	Yes	No	1	Yes	Yes	Yes	No	No	0	Hygienic service	3elec	Yes	Yes	No		public
Medium	1	Yes	No	0	No	No	No	No	No	0	Hygienic service	3elec	No	Yes	Yes		public
Low	0	Yes	Yes	1	Yes	No	Yes	No	No	0	Hygienic service	4elec	No	No	No		private
High	1	Yes	No	0	No	No	No	No	No	0	Hygienic service	4elec	No	No	No		private
Low	1	Yes	No	0	No	No	No	No	No	0	Hygienic service	3elec	No	Yes	No		public
Medium	1	Yes	Yes	1	No	No	No	No	No	0	Hygienic service	3elec	No	Yes	No		public
Low	1	Yes	No	1	Yes	Yes	No	No	No	0	Hygienic service	4elec	Yes	Yes	No		public
Low	1	Yes	No	1	No	No	No	No	No	0	Hygienic service	2 or less	No	No	No		public
	1	No	Yes	0	Yes	Yes	No	No	No	0	Hygienic service	4elec	No	Yes	No		public
Low	0	Yes	No	0	Yes	No	No	No	No	0	Hygienic service	2 or less	Yes	Yes	No		public
Medium	1	Yes	No	1	No	No	Not Known	No	No	0	Hygienic service	4elec	No	No	No		public
Medium	0	Yes	No	0	No	No	No	No	No	0	Hygienic service	3elec	No	Yes	Yes		public
Low	1	Yes	No	1	No	No	No	No	No	0	Hygienic service	2 or less	No	No	No		public
Medium	1	Yes	No	1	No	No	No	No	No	0	latine or field	3elec	No	No	No		public
Medium	1	Yes	Yes	0	No	Yes	Yes	Yes	No	0	Hygienic service	3elec	No	No	No		public
Medium	1	Yes	No	0	No	No	No	No	No	1	Hygienic service	4elec	No	No	Yes		public
Medium	1	Yes	No	0	No	No	No	No	No	0	Hygienic service	4elec	No	No	Yes		public
High	0	Yes	No	0	No	No	No	No	No	0	Hygienic service	4elec	Yes	Yes	No		public
Medium	1	Yes	Yes	0	Yes	No	Yes	Not Known	No	1	Hygienic service	4elec	No	Yes	Yes		public
Low	0	Yes	No	0	No	Yes	No	No	No	0	Hygienic service	2 or less	No	Yes	Yes		public
Medium	1	Yes	No	0	No	No	No	No	No	0	Hygienic service	4elec	Yes	Yes	No		public
Medium	1	Yes	No	0	No	No	No	No	No	0	Hygienic service	3elec	No	No	No		public
Medium	0	Yes	No	1	No	No	No	No	No	0	Hygienic service	2 or less	Yes	Yes	No		public
Medium	0	Yes	No	1	No	No	Yes	No	No	0	Hygienic service	4elec	No	No	No		public
Medium	1	Yes	No	1	No	No	No	No	No	0	Hygienic service	4elec	No	No	No		public
	1	Yes	No	0	No	No	No	No	No	1	Hygienic service	4elec	No	Yes	No		public
High	0	Yes	No	0	Yes	No	Yes	No	No	0	Hygienic service	3elec	Yes	Yes	Yes		private
High	0	Yes	No	0	No	No	No	No	No	0	Hygienic service	4elec	No	Yes	Yes		private
Medium	1	Yes	No	0	No	No	Yes	No	No	0	Hygienic service	4elec	Yes	No	No		private
Low	0	Yes	Yes	0	No	No	No	No	No	0	Hygienic service	3elec	No	No	No		public
Low	0	Yes	No	0	No	No	No	No	No	0	Hygienic service	2 or less	No	No	No		public
Low	1	Yes	Yes	0	No	No	No	No	No	0	Hygienic service	3elec	No	No	No		public
Medium	1	Yes	No	0	No	No	Yes	No	No	0	Hygienic service	3elec	No	Yes	No		public
Low	1	Yes	No	0	No	No	No	Not Known	No	0	latine or field	4elec	No	No	No		public
Low	0	Yes	No	1	No	No	No	No	No	0	Hygienic service	3elec	No	No	Yes		public
Low	1	Yes	No	1	No	Yes	No	Yes	No	1	Hygienic service	3elec	No	No	Yes		public
Medium	1	Yes	No	1	No	No	No	No	No	0	Hygienic service	3elec	No	Yes	No		public
Low	1	Yes	Yes	0	No	No	No	No	No	0	latine or field	3elec	No	Yes	No		public
Medium	0	Yes	No	0	No	No	No	No	No	0	Hygienic service	4elec	No	Yes	No		public
Medium	1	Yes	Yes	0	No	No	No	No	No	0	Hygienic service	4elec	No	No	Yes		public
Medium	1	Yes	No	1	No	No	Not Known	Not Known	No	0	Hygienic service	3elec	No	No	No		public
	1	Yes	No	1	No	No	No	No	No	0	Hygienic service	4elec	No	No	No		public
Low	1	Yes	No	1	Yes	No	Yes	No	No	0	Hygienic service	4elec	No	No	Yes		public
Medium	1	Yes	No	0	Yes	No	Not Known	Not Known	No	0	Hygienic service	4elec	No	Yes	No		public
High	1	Yes	No	0	No	No	No	No	No	0	Hygienic service	4elec	Yes	Yes	No		public
High	1	No	Yes	0	No	No	No	No	No	0	Hygienic service	4elec	No	Yes	No		public
Medium	1	No	No	1	No	No	No	No	No	0	Hygienic service	2 or less	No	No	No		public
Medium	1	Yes	No	1	No	No	No	No	Yes	1	Hygienic service	4elec	No	No	No		private
	1	Yes	Yes	1	No	No	No	No	No	0	Hygienic service	3elec	Yes	Yes	No		private
High	1	Yes	Yes	0	No	No	No	No	No	0	Hygienic service	4elec	No	No	No		private
Medium	1	Yes	No	1	No	No	No	No	No	0	Hygienic service	4elec	No	No	No		private
Medium	1	Yes	No	1	No	No	Not Known	Not Known	No	0	Hygienic service	3elec	No	Yes	No		public
Medium	1	Yes	No	0	No	No	No	No	No	0	Hygienic service	3elec	No	No	No		public
High	1	Yes	No	1	Yes	No	No	No	No	0	Hygienic service	3elec	Yes	Yes	No		private
Medium	1	Yes	No	0	Yes	No	Yes	Yes	No	0	Hygienic service	3elec	Yes	Yes	Yes		private
Medium	1	Yes	No	0	No	No	No	No	No	0	Hygienic service	2 or less	No	No	No		private
Medium	0	Yes	No	0	Yes	No	No	No	No	0	Hygienic service	4elec	No	Yes	No		private
High	1	Yes	Yes	0	No	No	No	No	No	0	Hygienic service	4elec	Yes	Yes	No		private
Medium	1	Yes	Yes	0	No	No	No	No	No	0	Hygienic service	4elec	No	Yes	No		private
High	0	Yes	Yes	0	No	No	No	No	No	0	Hygienic service	4elec	No	No	No		private
High	1	Yes	Yes	0	Yes	No	Yes	No	No	1	Hygienic service	4elec	No	No	No		private
	1	Yes	No	0	Yes	No	No	No	No	0	Hygienic service	3elec	No	Yes	No		private
High	1	Yes	Yes	0	No	No	Yes	No	No	0	Hygienic service	4elec	No	Yes	No		private
High	1	Yes	Yes	0	No	No	No	No	No	0	Hygienic service	4elec	No	No	Yes		private
High	1	Yes	Yes	0	Yes	No	Yes	No	Yes	1	Hygienic service	4elec	No	Yes	No		private
High	1	Yes	Yes	1	No	No	Yes	Yes	No	0	Hygienic service	4elec	Yes	Yes	No		private
Medium	1	Yes	Yes	0	No	No	Yes	Not Known	No	1	Hygienic service	4elec	No	No	No		private
High	1	Yes	No	1	Yes	No	Yes	Yes	No	0	Hygienic service	4elec	No	Yes	No		private
Medium	1	Yes	Yes	1	Yes	Yes	No	Yes	No	1	Hygienic service	4elec	Yes	Yes	Yes		public
Low	1	Yes	No	1	No	No	No	No	No	0	Hygienic service	3elec	No	Yes	No		public
Medium	1	Yes	No	0	No	No	No	No	No	0	Hygienic service	4elec	No	Yes	No		public
	1	Yes	No	0	No	No	No	No	No	0	Hygienic service	3elec	No	No	Yes		public
	1	No	Yes	0	Yes	Yes	Not Known	Yes	Yes	0	Hygienic service	3elec	No	Yes	Yes		public
High	1	Yes	No	0	Yes	No	No	No	No	0	Hygienic service	4elec	No	No	No		private
Medium	1	Yes	Yes	0	No	No	Yes	No	No	0	Hygienic service	4elec	No	Yes	No		private
High	1	Yes	Yes	0	No	No	No	No	No	0	Hygienic service	4elec	No	Yes	No		private
High	0	Yes	Yes	0	Yes	Yes	No	No	No	1	Hygienic service	4elec	Yes	Yes	Yes		private
High	0	Yes	Yes	0	No	No	No	No	No	0	Hygienic service	4elec	No	No	No		private
High	0	Yes	Yes	0	Yes	Yes	Yes	No	No	0	Hygienic service	4elec	No	No	No		private
High	0	Yes	No	0	No	No	No	No	No	0	Hygienic service	4elec	No	Yes	No		private
High	1	Yes	Yes	1	Yes	No	Yes	No	No	0	Hygienic service	4elec	No	Yes	No		private
High	1	Yes	Yes	0	Yes	No	No	No	No	0	Hygienic service	4elec	Yes	Yes	No		private
High	1	Yes	Yes	0	Yes	No	Yes	No	No	0	Hygienic service	4elec	No	Yes	No		private
High	1	Yes	Yes	0	No	No	Yes	No	No	0	Hygienic service	4elec	No	No	No		private
High	1	Yes	Yes	0	No	No	No	No	No	0	Hygienic service	4elec	No	Yes	No		private
High	1	Yes	No	0	Yes	Yes	No	No	No	0	Hygienic service	4elec	No	Yes	No		private
High	1	Yes	No	0	No	Yes	No	No	No	0	Hygienic service	4elec	No	No	No		private
High	1	Yes	No	0	No	No	No	No	No	0	Hygienic service	4elec	No	No	Yes		private
High	1	No	No	0	Yes	No	No	No	No	0	Hygienic service	4elec	No	Yes	Yes		private
High	1	No	No	0	No	No	Yes	No	No	0	Hygienic service	4elec	No	Yes	No		private
High	1	Yes	Yes	1	Yes	No	No	No	Yes	1	Hygienic service	4elec	No	No	No		private
High	1	Yes	Yes	0	No	No	No	No	No	0	Hygienic service	4elec	No	Yes	No		private
High	1	Yes	No	1	Yes	Yes	Not Known	Not Known	No	0	Hygienic service	3elec	No	No	Yes		private
High	1	Yes	No	1	Yes	No	No	No	No	0	Hygienic service	4elec	Yes	Yes	No		private
High	0	Yes	No	0	No	No	No	No	No	0	Hygienic service	4elec	No	No	No		private
High	1	Yes	No	0	No	No	Yes	No	No	0	Hygienic service	4elec	No	No	Yes		private
High	1	Yes	Yes	0	No	No	Yes	Not Known	No	0	Hygienic service	4elec	Yes	Yes	No		private
Medium	1	Yes	No	0	Yes	No	No	No	No	0	Hygienic service	4elec	No	No	No		private
High	0	Yes	No	0	No	No	No	No	No	0	Hygienic service	4elec	No	No	Yes		private
High	1	Yes	Yes	0	Yes	Yes	No	No	No	1	Hygienic service	4elec	No	No	Yes		private
Medium	1	Yes	Yes	0	Yes	No	No	No	No	0	Hygienic service	4elec	No	Yes	Yes		private
	1	No	Yes	0	Yes	No	Yes	No	No	0	Hygienic service	4elec	No	No	No		private
Medium	1	Yes	No	1	No	Yes	No	Yes	No	0	Hygienic service	4elec	Yes	Yes	No		public
Medium	1	Yes	No	0	No	Yes	No	No	No	0	Hygienic service	4elec	Yes	No	No		public
Medium	1	Yes	No	0	Yes	No	Not Known	Not Known	No	0	Hygienic service	2 or less	No	Yes	Yes		public
Medium	1	Yes	No	0	Yes	Yes	No	No	No	0	Hygienic service	4elec	No	Yes	Yes		public
Low	0	Yes	Yes	0	No	No	No	No	No	0	Hygienic service	3elec	No	Yes	No		public
High	0	Yes	No	0	No	Yes	No	No	No	0	Hygienic service	3elec	Yes	Yes	No		public
Medium	1	Yes	Yes	1	Yes	Yes	No	No	Yes	1	Hygienic service	4elec	No	No	Yes		private
High	1	Yes	Yes	0	Yes	No	No	No	Yes	1	Hygienic service	4elec	No	Yes	No		private
Medium	1	Yes	Yes	0	Yes	Yes	Not Known	Not Known	No	0	Hygienic service	2 or less	Yes	Yes	Yes		private
High	1	Yes	No	1	No	No	No	No	No	0	Hygienic service	4elec	No	Yes	Yes		private
Low	0	Yes	No	0	No	Not Known	No	No	No	0	Hygienic service	2 or less	No	No	No		public
Medium	1	Yes	Yes	0	No	Not Known	No	Not Known	No	0	Hygienic service	4elec	No	Yes	Yes		public
High	1	Yes	No	0	Not Known	No	No	No	No	0	Hygienic service	4elec	No	Yes	Yes		public
Medium	1	Yes	No	0	No	Not Known	No	Not Known	No	0	Hygienic service	4elec	Yes	Yes	Yes		public
Low	1	Yes	Yes	0	Yes	No	No	No	No	0	Hygienic service	4elec	Yes	Yes	Yes		private
High	1	No	Yes	0	Yes	Not Known	No	No	No	0	Hygienic service	3elec	No	No	Yes		private
Medium	0	Yes	Yes	0	Not Known	No	Not Known	No	No	0	Hygienic service	3elec	No	Yes	No		public
Low	1	Yes	Yes	1	No	No	No	No	No	0	Hygienic service	2 or less	No	No	No		public
Medium	1	Yes	Yes	0	No	Not Known	No	Not Known	No	0	Hygienic service	3elec	Yes	No	No		public
High	1	No	No	0	No	Not Known	Yes	No	No	0	Hygienic service	3elec	No	Yes	Yes		public
High	1	Yes	Yes	1	Yes	No	Yes	No	No		Hygienic service	3elec	No	No	No		public
Medium	1	Yes	Yes	0	No	No	Not Known	Not Known	No	0	Hygienic service	3elec	No	No	No		public
Low	1	Yes	No	0	No	Not Known	No	No	No	1	Hygienic service	2 or less	No	No	No		public
High	1	Yes	Yes	0	Yes	No	Yes	No	No		Hygienic service	4elec	No	Yes	No		private
Medium	1	Yes	Yes	1	Yes	No	No	Yes	No	1	Hygienic service	4elec	No	Yes	No		public
Low	1	Yes	Yes	0	Not Known	No	Not Known	Not Known	No	0	Hygienic service	2 or less	No	Yes	No		public
Low	1	Yes	Yes	1	No	Not Known	Not Known	Not Known	No	0	latine or field	2 or less	No	No	No		public
Medium	1	Yes	No	0	Yes	Not Known	Not Known	No	No	1	Hygienic service	4elec	No	Yes	No		public
Low	1	Yes	No	0	No	Not Known	No	No	No	0	Hygienic service	4elec	No	No	No		public
High	1	Yes	Not Known	1	No	No	Yes	No	No	0	Hygienic service	2 or less	No	Yes	No		public
Medium	0	Yes	No	0	Yes	Not Known	No	No	No	0	Hygienic service	4elec	Yes	Yes	No		private
High	1	Yes	Yes	1	Yes	Yes	Yes	No	Not Known	0	Hygienic service	4elec	No	Yes	No		public
Low	1	Yes	No	1	Not Known	No	No	No	No	1	Hygienic service	3elec	No	No	Yes		public
Medium	1	Yes	Yes	0	Yes	No	No	No	No	1	Hygienic service	4elec	No	Yes	Yes		public
Medium	1	Yes	No	0	No	Not Known	No	Not Known	No	0	Hygienic service	4elec	No	No	No		public
Medium	1	Yes	Yes	0	Not Known	No	No	Yes	No	0	Hygienic service	3elec	No	Yes	Yes		public
Low	1	No	No	0	No	No	No	No	No	0		2 or less	No	No	No		public
Low	0	Yes	No	1	No	No	No	No	No	0	Hygienic service	2 or less	No	No	Yes		public
Low	1	Yes	Yes	0	No	Not Known	No	Not Known	No	0	Hygienic service	4elec	No	No	No		public
Low	1	Yes	Yes	0	No	Not Known	No	Not Known	No	0	Hygienic service	4elec	No	No	No		public
Medium	1	Yes	No	0	No	No	No	No	No	0	Hygienic service	4elec	No	Yes	No		public
Medium	0	Yes	No	0	No	Not Known	Yes	Not Known	No	0	Hygienic service	4elec	No	No	Yes		public
Medium	1	Yes	Yes	0	Not Known	No	Not Known	Not Known	No	0	Hygienic service	4elec	No	Yes	Yes		private
High	1	Yes	No	0	No	Not Known	Yes	No	No	0	Hygienic service	4elec	No	Yes	Yes		private
Medium	0	Yes	No	0	Not Known	No	No	No	No	0	Hygienic service	3elec	No	No	No		public
Medium	1	Yes		0	No	No	No	No	No	0	Hygienic service	4elec	No	No	No		public
Medium	1	Yes	No	0	Yes	Not Known	Yes	Not Known	No	0	Hygienic service	4elec	No	Yes	No		public
Medium	1	Yes	No	0	Not Known	No	Not Known	Not Known	No	0	Hygienic service	4elec	No	No	No		private
Low	0	Yes	No	0	No	No	No	No	No	0	Hygienic service	2 or less	No	Yes	Yes		public
Medium	0	Yes	No	1	No	No	No	No	No	0		3elec	No	Yes	Yes		public
Medium	1	Yes	No	1	No	Not Known	No	No	No	1	Hygienic service	4elec	Yes	Yes	Yes		public
High	1	Yes	No	0	No	No	No	No	No	0		4elec	No	Yes	No		private
High	1	Yes	Yes	0	Yes	Not Known	Yes	No	No		Hygienic service	4elec	No	Yes	No		private
High	1	Yes	Yes	0	Yes	No	No	No	No		Hygienic service	4elec	Yes	Yes	Yes		private
Medium	0	Yes	No	0	Not Known	Not Known	Yes	Yes	No	1	Hygienic service	3elec	No	Yes	Yes		public
High	0	Yes	Yes	0	Not Known	Not Known	Not Known	Not Known	No	0	Hygienic service	4elec	Yes	Yes	No		public
Low	0	Yes	Yes	1	Not Known	Not Known	Not Known	Not Known	No	0	Hygienic service	2 or less	No	Yes	No		public
Medium	1	Yes	No	0	Yes	Not Known	Not Known	Not Known	No	0	Hygienic service	3elec	No	Yes	Yes		public
Low	1	Yes	No	0	No	Not Known	No	No	No	0	Hygienic service	2 or less	No	No	No		public
Medium	0	Yes		0	No	No	No	No	No	1	Hygienic service	4elec	No	Yes	No		public
High	1	Yes	No	1	Yes	Not Known	No	Yes	No	0	Hygienic service	4elec	No	Yes	No		private
Low	1	Yes	No	1	Yes	Not Known	Not Known	Not Known	No	0	Hygienic service	2 or less	Yes	Yes	Yes		public
Medium	0	Yes	No	1	No	Not Known	No	Not Known	No	0		4elec	No	No	No		public
Medium	1	Yes	No	0	Not Known	Not Known	Not Known	No	No	0	Hygienic service	2 or less	No	No	Yes		public
Low	1	Yes	No	0	Not Known	Not Known	No	Not Known	No	0	latine or field	4elec	No	No	No		public
Low	1	Yes	No	0	Not Known	Not Known	No	Yes	No	0	Hygienic service	2 or less	No	No	No		public
Low	1	Yes	No	0	Not Known	Not Known	Not Known	Not Known	No	1	Hygienic service	4elec	Yes	Yes	No		public
Low	1	Yes	Yes	1	Not Known	Not Known	No	No	No	0	latine or field	3elec	No	No	No		public
Medium	1	Yes	No	1	Not Known	Not Known	Not Known	Not Known	No	1	Hygienic service	2 or less	Yes	Yes	Yes		public
Medium	1	Yes	No	1	Not Known	Not Known	Yes	No	Not Known	0	Hygienic service	4elec	No	Yes	Yes		public
Low	1	Yes	No	0	Not Known	Not Known	No	No	No	0	Hygienic service	2 or less	No	No	No		public
High	1	Yes	No	0	No	No	Yes	No	No	0	Hygienic service	3elec	No	Yes	No		private
High	0	Yes	No	1	No	No	No	No	No	0	Hygienic service	4elec	No	No	No		public
Medium	0	Yes	No	0	Yes	No	No	No	No	1	Hygienic service	3elec	No	No	No		public
Medium	1	Yes	No	1	Yes	No	No	No	No	0	Hygienic service	4elec	No	No	No		public
Medium		Yes	No	1	Not Known	Not Known	Not Known	Not Known		1	Hygienic service	3elec	No	No	Yes		private
Low	1	Yes	No		No	No	No	No	No	0	Hygienic service	3elec	No	No	No		public
